# Supplementary material for: Positive Psychological Factors Are Associated With Better Spiritual Well-Being and Lower Distress in Individuals With Skin Diseases
Source: Front Psychol. 2020 Oct 6;11:552764. doi: 10.3389/fpsyg.2020.552764 (PMC7573544; doi:10.3389/fpsyg.2020.552764)
Supplement: Supplementary file 1 [file Table_1.XLSX]

## Sheet: Foglio1
TABLE S1 | Hierarchical regression analysis between negative and positive functioning (independent variables) and spiritual well-being (dependent variable): Models 1-5
		B	SE B	β	t	p	pr
Model 1
	Symptoms	-0.38	0.1	-0.29	-3.76	0	-0.29
Model 2
	Symptoms	-0.38	0.1	-0.29	-3.74	0	-0.29
	Type of disease	1.13	1.45	0.06	0.78	0.438	0.06
Model 3
	Symptoms	-0.32	0.1	-0.24	-3.15	0.002	-0.24
	Type of disease	0.22	1.45	0.01	0.15	0.881	0.01
	Reappraisal	0.24	0.08	0.24	2.96	0.004	0.23
	Suppression	-0.2	0.11	-0.14	-1.76	0.081	-0.14
Model 4
	Symptoms	-0.12	0.09	-0.09	-1.35	0.178	-0.11
	Type of disease	-0.25	1.19	-0.01	-0.21	0.837	-0.02
	Reappraisal	0.11	0.07	0.11	1.62	0.106	0.13
	Suppression	0	0.1	0	0.03	0.976	0
	Comprehensibility/manageability	0.38	0.08	0.35	4.53	0	0.34
	Meaningfulness	0.56	0.14	0.32	3.9	0	0.3
Model 5
	Symptoms	-0.11	0.08	-0.08	-1.42	0.157	-0.11
	Type of disease	-0.11	1.08	-0.01	-0.1	0.922	-0.01
	Reappraisal	0.06	0.06	0.06	0.96	0.341	0.08
	Suppression	0.02	0.09	0.01	0.21	0.838	0.02
	Comprehensibility/manageability	0.23	0.08	0.21	2.87	0.005	0.23
	Meaningfulness	0.32	0.14	0.18	2.31	0.022	0.18
	Positivity	0.57	0.1	0.42	5.87	0	0.43
Note. pr = partial correlations
Hierarchical regression analysis between negative and positive functioning (independent variables) and psychological distress (dependent variable): Models 1-5
		B	SE B	β	t	p	pr
Model 1
	Symptoms	0.47	0.07	0.47	6.65	0	0.47
Model 2
	Symptoms	0.47	0.07	0.47	6.62	0	0.47
	Type of disease	-0.16	1.06	-0.01	-0.15	0.882	-0.01
Model 3
	Symptoms	0.39	0.07	0.39	5.65	0	0.42
	Type of disease	0.78	1.02	0.05	0.77	0.444	0.06
	Reappraisal	-0.19	0.06	-0.25	-3.44	0.001	-0.27
	Suppression	0.32	0.08	0.3	4.14	0	0.32
Model 4
	Symptoms	0.27	0.06	0.27	4.26	0	0.33
	Type of disease	1.05	0.9	0.07	1.17	0.243	0.1
	Reappraisal	-0.12	0.05	-0.16	-2.38	0.018	-0.19
	Suppression	0.21	0.07	0.19	2.83	0.005	0.23
	Comprehensibility/manageability	-0.24	0.06	-0.29	-3.89	0	-0.3
	Meaningfulness	-0.29	0.11	-0.22	-2.76	0.007	-0.22
Model 5
	Symptoms	0.27	0.06	0.27	4.24	0	0.33
	Type of disease	1.04	0.9	0.07	1.16	0.247	0.1
	Reappraisal	-0.12	0.05	-0.15	-2.3	0.023	-0.18
	Suppression	0.21	0.07	0.19	2.82	0.006	0.22
	Comprehensibility/manageability	-0.23	0.06	-0.28	-3.59	0	-0.28
	Meaningfulness	-0.28	0.11	-0.21	-2.5	0.014	-0.2
	Positivity	-0.03	0.08	-0.03	-0.36	0.723	-0.03
Note. pr = partial correlations
